# Supplementary material for: Opioid and Nonpharmacologic Treatments Among Soldiers With Chronic Pain and Posttraumatic Stress Disorder
Source: Atypon-hosted journal article supplement (doi:10.1176/appi.ps.201900303), 2021-01-20
Supplement: appi.ps.201900303.ds001.pdf [file appi.ps.201900303.ds001.pdf]

**Appendix - Percentage of active duty soldier demographic subgroups by PTSD status and chronic pain status (n=576,425)<sup>1</sup>**

|                                 | No Chronic Pain (n = 506,116) |         |        |         | Chronic Pain (n = 70,309) |         |        |         |
|---------------------------------|-------------------------------|---------|--------|---------|---------------------------|---------|--------|---------|
|                                 | No PTSD                       |         | PTSD   |         | No PTSD                   |         | PTSD   |         |
|                                 | n                             | Percent | n      | Percent | n                         | Percent | n      | Percent |
| <b>Total</b>                    | 486,984                       | 96.2    | 19,132 | 3.8     | 60,156                    | 85.6    | 10,153 | 14.4%   |
| <b>Age group</b>                |                               |         |        |         |                           |         |        |         |
| 18-24 years                     | 199,929                       | 96.3    | 7,650  | 3.7     | 23,286                    | 86.7    | 3,566  | 13.3    |
| 25-29                           | 132,069                       | 96.2    | 5,262  | 3.8     | 14,521                    | 84.7    | 2,629  | 15.3    |
| 30-34                           | 67,840                        | 96.3    | 2,599  | 3.7     | 8,399                     | 84.6    | 1,524  | 15.4    |
| 35-39                           | 48,422                        | 96.0    | 2,029  | 4.0     | 7,230                     | 85.2    | 1,258  | 14.8    |
| 40+                             | 38,724                        | 96.1    | 1,592  | 3.9     | 6,720                     | 85.1    | 1,176  | 14.9    |
| <b>Gender</b>                   |                               |         |        |         |                           |         |        |         |
| Female                          | 47,624                        | 96.5    | 1,734  | 3.5     | 11,178                    | 89.0    | 1,387  | 11.0    |
| Male                            | 439,360                       | 96.2    | 17,398 | 3.8     | 48,978                    | 84.8    | 8,766  | 15.2    |
| <b>Race/Ethnicity</b>           |                               |         |        |         |                           |         |        |         |
| Non-Hispanic white              | 281,700                       | 96.3    | 10,774 | 3.7     | 31,087                    | 85.3    | 5,349  | 14.7    |
| Non-Hispanic African American   | 85,015                        | 96.6    | 3,036  | 3.4     | 14,014                    | 88.5    | 1,822  | 11.5    |
| Asian / Pacific Islander        | 3,036                         | 95.7    | 2,493  | 4.3     | 7,002                     | 82.1    | 1,529  | 17.9    |
| Hispanic                        | 55,480                        | 96.0    | 2,339  | 4.0     | 6,876                     | 84.9    | 1,223  | 15.1    |
| American Indian / Alaska Native | 4,375                         | 94.6    | 250    | 5.4     | 501                       | 82.8    | 104    | 17.2    |
| Other                           | 5,470                         | 95.8    | 240    | 4.2     | 676                       | 84.3    | 126    | 15.7    |
| <b>Marital Status</b>           |                               |         |        |         |                           |         |        |         |
| Married                         | 279,633                       | 95.8    | 12,304 | 4.2     | 37,745                    | 84.2    | 7,075  | 15.8    |
| Separated                       | 25,457                        | 95.4    | 1,222  | 4.6     | 4,259                     | 86.2    | 683    | 13.8    |

|                                                    |         |      |        |     |        |      |       |      |
|----------------------------------------------------|---------|------|--------|-----|--------|------|-------|------|
| Never Married                                      | 181,894 | 97.0 | 5,606  | 3.0 | 18,152 | 88.3 | 2,395 | 11.7 |
| <b>Rank</b>                                        |         |      |        |     |        |      |       |      |
| Junior Enlisted                                    | 240,560 | 96.0 | 10,034 | 4.0 | 36,043 | 86.1 | 5,828 | 13.9 |
| Senior Enlisted                                    | 166,844 | 95.5 | 7,894  | 4.5 | 19,121 | 83.3 | 3,821 | 16.7 |
| Warrant Officer                                    | 11,977  | 98.1 | 236    | 1.9 | 1,172  | 90.1 | 129   | 9.9  |
| Junior Officer                                     | 46,585  | 98.7 | 611    | 1.3 | 2,360  | 91.9 | 207   | 8.1  |
| Senior Officer                                     | 21,018  | 98.3 | 357    | 1.7 | 1,460  | 89.7 | 168   | 10.3 |
| <b>Fiscal year of return from index deployment</b> |         |      |        |     |        |      |       |      |
| 2008                                               | 78,992  | 93.6 | 5,386  | 6.4 | 3,339  | 79.1 | 882   | 20.9 |
| 2009                                               | 113,621 | 95.8 | 4,924  | 4.2 | 14,856 | 84.7 | 2,686 | 15.3 |
| 2010                                               | 108,907 | 96.7 | 3,720  | 3.3 | 16,224 | 85.9 | 2,661 | 14.1 |
| 2011                                               | 64,329  | 96.7 | 2,228  | 3.3 | 10,701 | 85.7 | 1,790 | 14.3 |
| 2012                                               | 55,810  | 97.0 | 1,703  | 3.0 | 7,356  | 84.9 | 1,305 | 15.1 |
| 2013                                               | 36,788  | 98.0 | 732    | 2.0 | 4,598  | 90.0 | 513   | 10.0 |
| 2014                                               | 28,537  | 98.5 | 439    | 1.5 | 3,082  | 90.7 | 316   | 9.3  |

<sup>1</sup> At least 2 ambulatory records with primary diagnoses of the same pain category condition spanning at least 90 days during the year, combined with self-reported pain scores of 4 to 10 (moderate to severe) on the numeric rating scale of 2 or more encounters spanning at least 90 days.
